# Supplementary material for: Analysis of Gene Expression in an Inbred Line of Soft-Shell Clams (Mya arenaria) Displaying Growth Heterosis: Regulation of Structural Genes and the NOD2 Pathway
Source: Hindawi journal article supplement (doi:10.1155/2016/6720947), 2016-01-01
Supplement: f1 [file 6720947.f1.pdf]

509 **Supplementary Figure S1.**

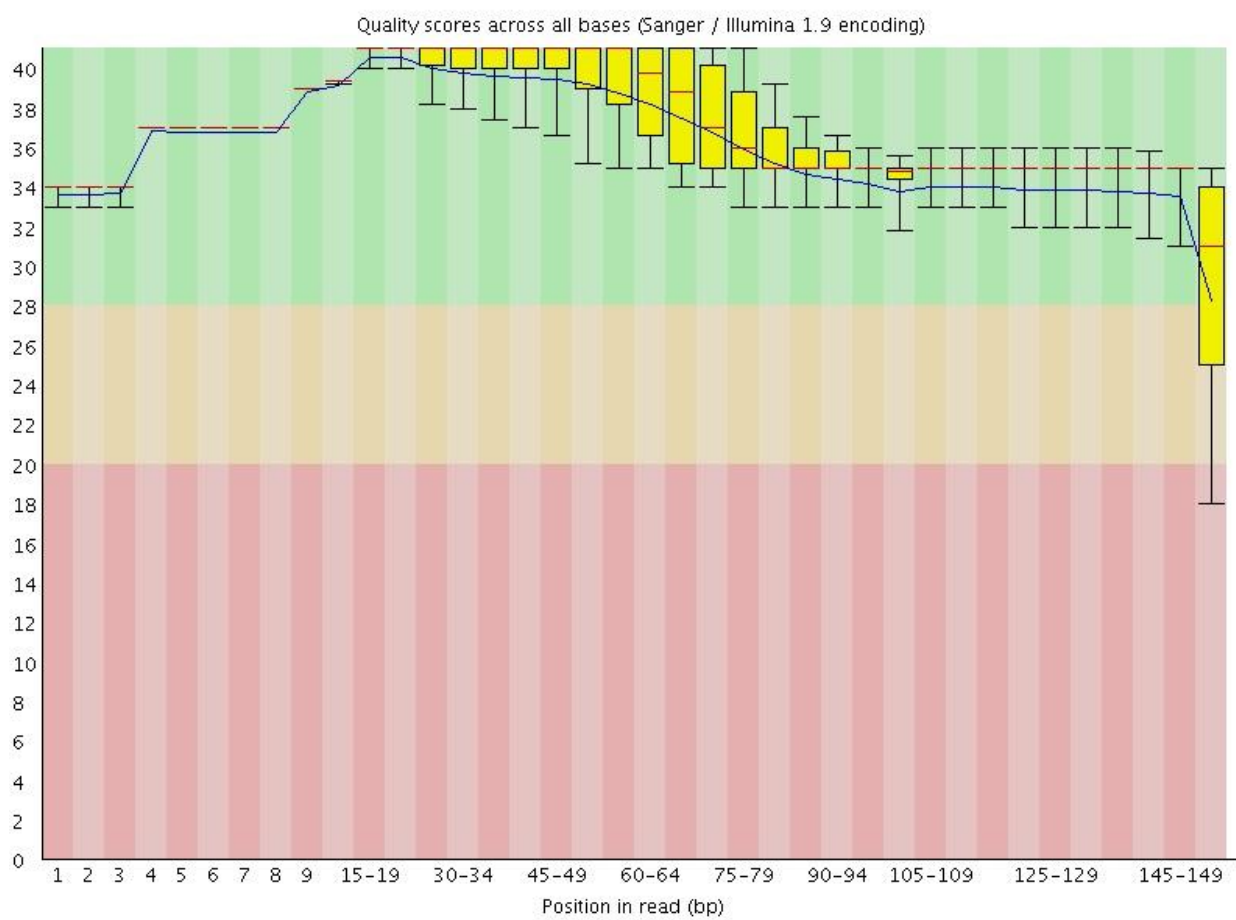

510

**Supplemental Figure S1**

**RNA-seq base-quality distribution. The Phred read quality scores for the paired-end RNAseq were plotted in FastQC (R). Quality scores are plotted against the position in each read. Error bars = SEM. The background of the graph divides the y axis into very good quality (green), reasonable quality (orange), and poor quality (red).**

Supplementary Figure S2

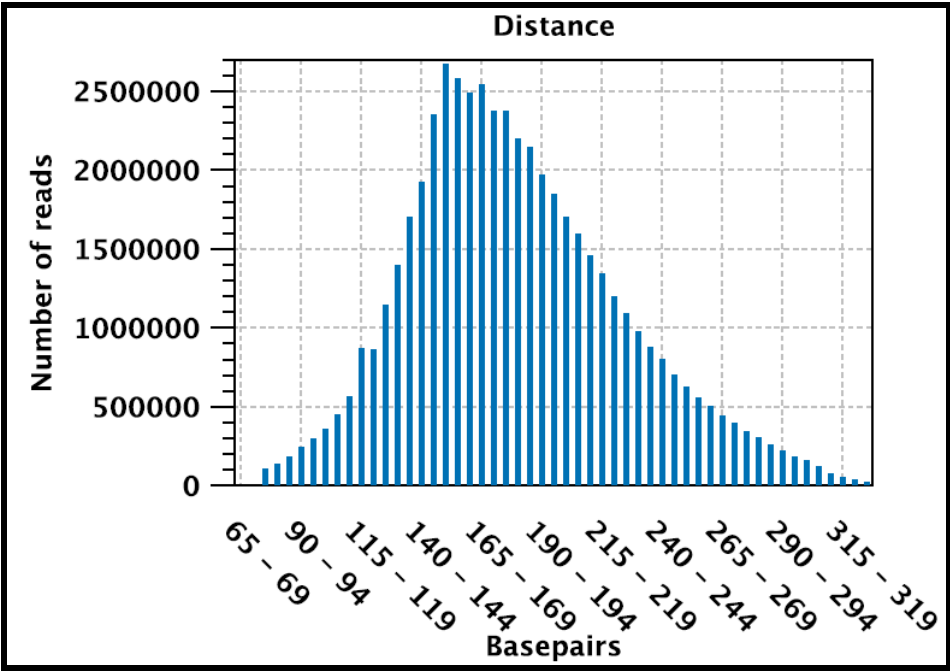

522 **Supplementary Figure S2**

523 **Read distribution plot. The number of reads (abundance) was plotted versus the**  
524 **nucleotide position in the read. The plot was generated in CLCBio.**

525 **A.**

| Primer  | Primer Sequence        | T <sub>m</sub> | Efficiency | C <sub>T</sub> |
|---------|------------------------|----------------|------------|----------------|
|         |                        | (°C)           | (%)        |                |
| ActinF1 | 5'GCGAAAATACTCCGTCTGGA | 60             | N.D.       | 29.78-35.24    |
| ActinR1 | 5'GCAGGTACGATCACAAGCAA | 60             |            |                |
| EF1F1   | 5'GGTGGCTGTTGGTGTCATC  | 60             | 70.2       | 20.32-22.55    |
| EF1R1   | 5'GGCCTAGGTGTTTTCCATGA | 60             |            |                |
| UQF1    | 5'TCGCTAAGGAGCTGGACATT | 60             | 214        | 32.40-39.99    |
| UQR2    | 5'ACCGTCGCTCCTTGACATC  | 60             |            |                |
| RPSF1   | 5'AAGATTCCCGACTGGTTCCT | 60             | 92-97      | 19.19-24.96    |
| RPSR1   | 5'GCCGGTTGTCTTTGTATGCT | 60             |            |                |

526

527 **B.**

| Primer   | Primer Sequence        | T <sub>m</sub> | Efficiency | $\Delta\Delta C_T$ |
|----------|------------------------|----------------|------------|--------------------|
|          |                        | (°C)           | (%)        | (+/-S.D.)          |
| RPSF1    | 5'AAGATTCCCGACTGGTTCCT | 51.8           | 92-97      | 0.3                |
| RPSR1    | 5'GCCGGTTGTCTTTGTATGCT | 51.8           |            | +/- 1.4            |
| BIRC2-F1 | 5'GATGGAAGACGACCCTGACC | 60.3           | 103-118    | 7.60               |
| BIRC2-R2 | 5'ACGTCCGCTTTCCTATCCAG | 60.5           |            | +/-2.02            |

528

**Supplemental Table S1.**

**Quantitative PCR primer sequences and conditions**

**A. Primers from Araya et al. (2008) tested for suitability as reference genes in qPCR. Experiments were conducted as listed in “Methods” using SYBR green as a probe.  $T_m$  is the expected melting temperature reported by Araya et al (2008). Efficiency is efficiency of qPCR amplification reported as a percent.  $C_T$  is the threshold level of amplification reported as a range including individual variation. N.D. indicates “not determined”. Note that EF1 also produced duplicate melt curves.**

**B. The relative abundance of BIRC2 mRNA, compared to RPS mRNA abundance, was determined by qRT-PCR. Experiments were conducted as listed in “Methods” using SYBR green as a probe. Data is reported as mean  $\pm$  standard deviation for three experimental replicates**

542

## Supplemental Figure S3

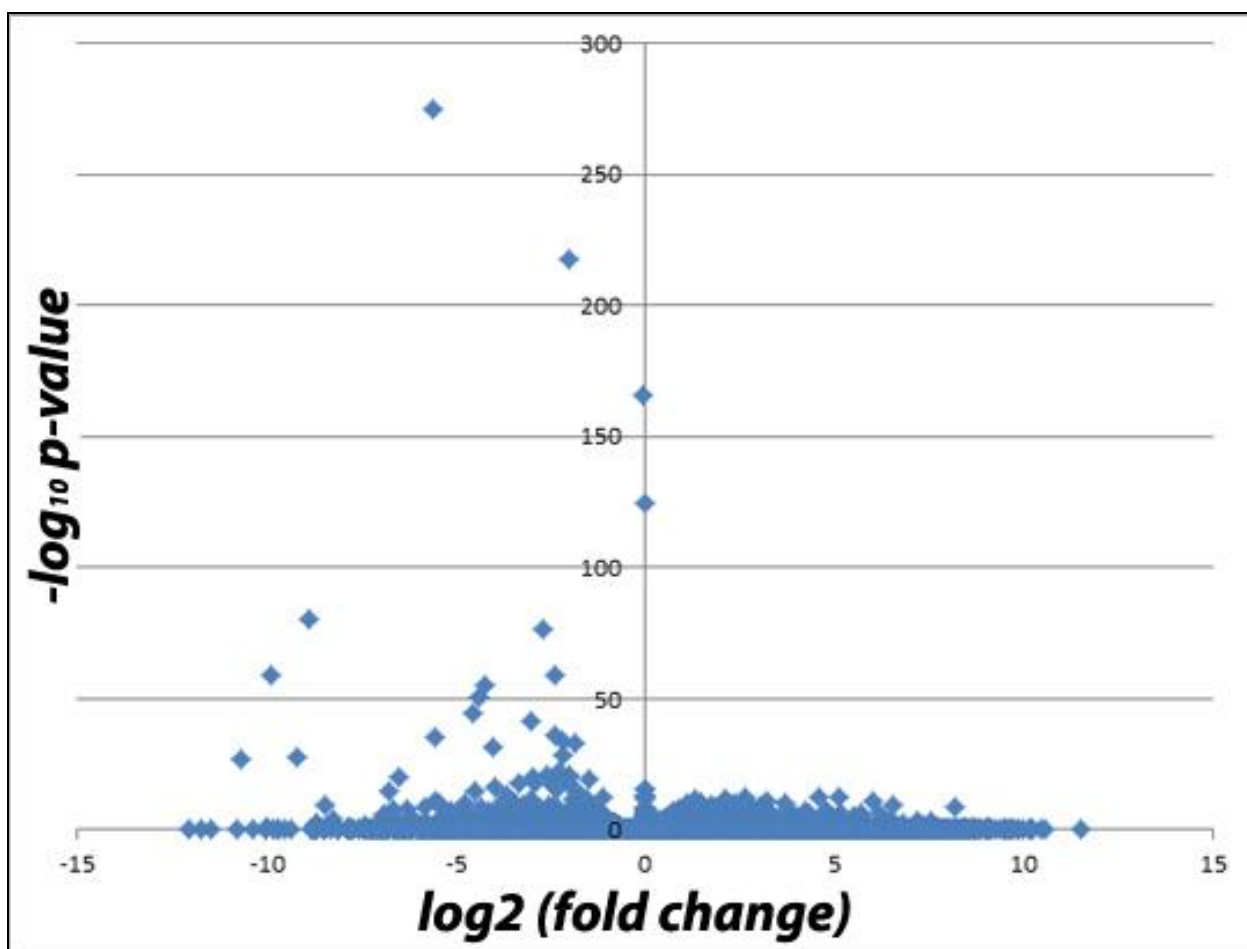

543

544

545 **Supplemental Figure S3**

546 **Volcano plot showing the global transcriptional changes in FG clams as assayed**  
547 **by RNAseq. The log 2-fold change in the FG clams versus F1 is represented on**  
548 **the x-axis. The y-axis shows the  $\log_{10}$  of the p value.**
